# Supplementary material for: Identification of Salt-Stress-Induced Genes from the RNA-Seq Data of Reaumuria trigyna Using Differential-Display Reverse Transcription PCR
Source: Int J Genomics. 2014 Nov 26;2014:381501. doi: 10.1155/2014/381501 (PMC4322826; doi:10.1155/2014/381501)
Supplement: Supplementary file 1 — Additional file 1 provides the detailed annotation information of the 18 identified transcripts. Additional file 2 provides the primer sequences used for qPCR experiments. [file 381501.f1.xlsx]

## Sheet: additional file 1
Annotations of the identified transcripts
geneID	geneLength	C21_rawreads(8486531)	C21_RPKM	T43_rawreads(9560248)	T43_RPKM	Nr-ID	Nr-Score	Nr-Evalue	Nr-annotation	Swissprot-ID	Swissprot-Score	Swissprot-Evalue	Swissprot-annotation	COG-Protein-or-Domain	COG-Score	COG-Evalue	COG-ID	COG-Function-Description	KO_id	KEGG-Evalue	KEGG-Score	KEGG-Gene	ko_definition	GO-BiologicalProcess	GO-MolecularFunction	Go-CellularComponent
Unigene812	774	898	136.712	1988	268.662	gi|15233937|ref|NP_195570.1|	254	6e-67	ATFP6 (FARNESYLATED PROTEIN 6); metal ion binding [Arabidopsis thaliana] >gi|11692850|gb|AAG40028.1|AF324677_1 AT4g38580 [Arabidopsis thaliana] >gi|14190521|gb|AAK55741.1|AF380660_1 AT4g38580/F20M13_140 [Arabidopsis thaliana] >gi|4467145|emb|CAB37514.1| farnesylated protein (ATFP6) [Arabidopsis thaliana] >gi|7270841|emb|CAB80522.1| farnesylated protein (ATFP6) [Arabidopsis thaliana] >gi|15810115|…	--	--	--	--	--	--	--	--	--	--	--	--	--	--	GO:0006812//cation transport;GO:0009408//response to heat	GO:0043169//cation binding	GO:0016020//membrane
Unigene49359	678	283	49.1843	5211	803.937	gi|110180497|gb|ABG54481.1|	157	1e-37	late embryogenesis abundant protein [Tamarix androssowii]	sp|Q39644|LEA5_CITSI	72	3e-12	Late embryogenesis abundant protein Lea5 OS=Citrus sinensis GN=LEA5 PE=2 SV=1	--	--	--	--	--	--	--	--	--	--	-	-	-
Unigene6492	656	17	3.0536	54	8.6103	gi|38490651|gb|AAQ55288.2|	362	3e-99	phytocalpain [Nicotiana benthamiana]	--	--	--	--	--	--	--	--	--	--	--	--	--	--	GO:0019538//protein metabolic process;GO:0045165//cell fate commitment;GO:0003006//reproductive developmental process	GO:0004197//cysteine-type endopeptidase activity	GO:0016020//membrane
Unigene14666	900	104	13.6163	355	41.2588	gi|189162259|ref|YP_001936505.1|	476	1e-133	ATP synthase CF0 A subunit [Fagopyrum esculentum subsp. ancestrale] >gi|223635019|sp|B2XWN7.1|ATPI_FAGEA RecName: Full=ATP synthase subunit a, chloroplastic; AltName: Full=F-ATPase subunit IV; AltName: Full=ATP synthase F0 sector subunit a >gi|166065345|gb|ABY79720.1| ATP synthase CF0 A subunit [Fagopyrum esculentum subsp. ancestrale]	sp|B2XWN7|ATPI_FAGEA	476	7e-134	ATP synthase subunit a, chloroplastic OS=Fagopyrum esculentum subsp. ancestrale GN=atpI PE=3 SV=1	all0010	344	1e-94	COG0356	F0F1-type ATP synthase, subunit a	K02108	2e-133	471	vvi:100246719	F-type H+-transporting ATPase subunit a [EC:3.6.3.14]	-	-	-
Unigene29649	909	45	5.8334	1692	194.701	gi|86155935|gb|ABC86705.1|	443	1e-123	R111 [Coffea arabica]	sp|B0BN95|HARB1_RAT	63.2	2e-09	Putative nuclease HARBI1 OS=Rattus norvegicus GN=Harbi1 PE=2 SV=1	--	--	--	--	--	--	--	--	--	--	-	-	-
Unigene65098	686	56	9.6191	514	78.3736	--	--	--	--	--	--	--	--	--	--	--	--	--	--	--	--	--	--	-	-	-
Unigene5022	1095	408	43.9052	1244	118.833	gi|239056183|emb|CAQ58618.1|	220	2e-56	calcium binding [Vitis vinifera]	sp|Q9SVG9|CML42_ARATH	211	7e-54	Calcium-binding protein CML42 OS=Arabidopsis thaliana GN=CML42 PE=1 SV=1	SPAC3A12.14	63.9	5e-10	COG5126	Ca2+-binding protein (EF-Hand superfamily)	K13448	2e-60	229	pop:POPTR_676209	calcium-binding protein CML	-	GO:0005488//binding	-
Unigene47465	289	1109	452.172	4691	1697.85	gi|195641696|gb|ACG40316.1|	107	3e-23	SRC2 [Zea mays]	--	--	--	--	--	--	--	--	--	--	--	--	--	--	-	-	-
Unigene3621	1287	237	21.699	6151	499.917	gi|15225045|ref|NP_178662.1|	521	1e-146	OPR3 (OPDA-REDUCTASE 3); 12-oxophytodienoate reductase [Arabidopsis thaliana] >gi|42570715|ref|NP_973431.1| OPR3 (OPDA-REDUCTASE 3); 12-oxophytodienoate reductase [Arabidopsis thaliana] >gi|145328276|ref|NP_001077884.1| OPR3 (OPDA-REDUCTASE 3); 12-oxophytodienoate reductase [Arabidopsis thaliana] >gi|62900708|sp|Q9FUP0.2|OPR3_ARATH RecName: Full=12-oxophytodienoate reductase 3; AltName: Full=12-o…	sp|Q9FUP0|OPR3_ARATH	521	5e-147	12-oxophytodienoate reductase 3 OS=Arabidopsis thaliana GN=OPR3 PE=1 SV=2	all1865	286	5e-77	COG1902	NADH:flavin oxidoreductases, Old Yellow Enzyme family	K05894	5e-148	521	ath:AT2G06050	12-oxophytodienoic acid reductase [EC:1.3.1.42]	-	-	-
Unigene56616	1037	5	0.5681	115	11.5998	gi|224127456|ref|XP_002329282.1|	407	1e-112	cytochrome P450 [Populus trichocarpa] >gi|222870736|gb|EEF07867.1| cytochrome P450 [Populus trichocarpa]	sp|Q05047|C72A1_CATRO	140	2e-32	Secologanin synthase OS=Catharanthus roseus GN=CYP72A1 PE=2 SV=1	all1361	55.1	2e-07	COG2124	Cytochrome P450	K10717	1e-110	396	ath:AT5G38450	cytokinin trans-hydroxylase	-	GO:0016491//oxidoreductase activity;GO:0005506//iron ion binding	GO:0031410//cytoplasmic vesicle
Unigene13783	1889	531	33.1232	2566	142.087	gi|224108317|ref|XP_002314803.1|	937	0	sulfate/bicarbonate/oxalate exchanger and transporter sat-1 [Populus trichocarpa] >gi|222863843|gb|EEF00974.1| sulfate/bicarbonate/oxalate exchanger and transporter sat-1 [Populus trichocarpa]	sp|Q9SXS2|SUT33_ARATH	895	0	Probable sulfate transporter 3.3 OS=Arabidopsis thaliana GN=SULTR3;3 PE=2 SV=2	slr1776	260	7e-69	COG0659	Sulfate permease and related transporters (MFS superfamily)	--	--	--	--	--	GO:0015698//inorganic anion transport	GO:0015291//secondary active transmembrane transporter activity;GO:0015103//inorganic anion transmembrane transporter activity	GO:0031224//intrinsic to membrane
Unigene814	1208	80	7.8036	359	31.0855	gi|223452333|gb|ACM89494.1|	430	1e-119	kinase-like protein [Glycine max]	sp|P43293|NAK_ARATH	315	4e-85	Probable serine/threonine-protein kinase NAK OS=Arabidopsis thaliana GN=NAK PE=2 SV=2	Cgl2127_1	92.8	1e-18	COG0515	Serine/threonine protein kinase	K00924	2e-84	310	osa:4337593	[EC:2.7.1.-]	-	-	-
Unigene15235	641	203	37.3171	3092	504.559	gi|2677824|gb|AAB97140.1|	75.1	6e-13	abscisic stress ripening protein homolog [Prunus armeniaca]	sp|Q8MP30|Y7791_DICDI	62.4	2e-09	Uncharacterized histidine-rich protein DDB_G0274557 OS=Dictyostelium discoideum GN=DDB_G0274557 PE=4 SV=1	--	--	--	--	--	K12741	2e-07	52.8	ath:AT5G40490	heterogeneous nuclear ribonucleoprotein A1/A3	-	-	-
Unigene49313	614	540	103.632	3816	650.086	gi|224069629|ref|XP_002326388.1|	262	2e-69	beta-alanine n-methyltransferase related [Populus trichocarpa] >gi|222833581|gb|EEE72058.1| beta-alanine n-methyltransferase related [Populus trichocarpa]	sp|Q9FK25|OMT1_ARATH	106	1e-22	Quercetin 3-O-methyltransferase 1 OS=Arabidopsis thaliana GN=OMT1 PE=1 SV=1	--	--	--	--	--	K05279	1e-23	106	ath:AT5G54160	flavonol 3-O-methyltransferase [EC:2.1.1.76]	-	-	-
Unigene17593	660	177	31.6009	2925	463.567	gi|5360263|dbj|BAA81904.1|	282	3e-75	NtPRp27 [Nicotiana tabacum]	--	--	--	--	--	--	--	--	--	--	--	--	--	--	-	-	-
Unigene1371	905	810	105.465	3710	428.801	gi|213053828|gb|ACJ39219.1|	193	3e-48	cold-regulated protein [Glycine max]	--	--	--	--	--	--	--	--	--	--	--	--	--	--	-	-	-
Unigene37946	1041	173	19.5824	2680	269.287	gi|2981169|gb|AAC06243.1|	204	1e-51	osmotic stress-induced zinc-finger protein [Nicotiana tabacum]	sp|Q42430|ZFP1_WHEAT	124	8e-28	Zinc finger protein 1 OS=Triticum aestivum PE=2 SV=1	--	--	--	--	--	--	--	--	--	--	-	-	-
Unigene1734	1246	23	2.1751	369	30.977	gi|297796919|ref|XP_002866344.1|	355	9e-97	ATEXO70H7 [Arabidopsis lyrata subsp. lyrata] >gi|297312179|gb|EFH42603.1| ATEXO70H7 [Arabidopsis lyrata subsp. lyrata]	--	--	--	--	--	--	--	--	--	K07195	2e-93	339	ath:AT2G28650	exocyst complex component 7	GO:0016192//vesicle-mediated transport	-	GO:0043231//intracellular membrane-bounded organelle;GO:0044444//cytoplasmic part
Note：These sequences were annotated in the transcriptome database by aligning those against with the plant protein dataset of nr, SwissProt, Clusters of Orthologous Groups (COG), Gene Ontology (GO) and Kyoto Encyclopedia of Genes and Genomes databases (KEGG), respectively, using BLASTX with a significance threshold of E-value ≤ 10-5.

## Sheet: additional file 2
Primers used for qPCR confirmation
geneID	forward primer（5'---3'）	reverse primer(5'---3')	Product(bp)
unigene812	GACTGTGAAGGCTGTGAAC	AGCACGAGCTAATTGAGAC	291
unigene49359	TCTTCTCCTCCTTCATCCT	GACATTGCCATACCTTGC	229
unigene6492	ACCACAGAGGTCCGCAAGT	TCCAAAGCCAGAATACGAG	249
unigene14666	TCTGGTGTGGAAGTAGGTCAAC	GCTAACTCCCCCCGAGGTAACT	332
unigene29649	AGTGCGAGAAATCATCAACAGC	CTTGGATACGAGACGGAGTGG	311
Unigene65098	GCTTATGGAAATCAGCAACT	TCATCCTTAGGCACCTTATT	122
Unigene5022	CCTTCCTCAATCTCCACCT	CGATAAGGAGCGAACGAAG	163
Unigene47465	CCGTCGTTTGGGTTGAT	GGAGGCGTTTGGTGGTA	113
Unigene3621	ATCGAACAGACTCATACGGTG	ATAATCCGTTGCGTCTAAGTG	146
Unigene56616	GATGGTGGTAGTGGCGATG	ACGCACTCCTTGCTTCTCC	155
Unigene13783	CCGAGAAGCACCATACAGA	GATACCCTGAGGAATGGCTA	225
Unigene814	GCTTTGGTGTAGTTCTCCT	CTCATCGTTGGTCTATTCTT	238
Unigene15235	TCAACCCATTAGTGACAGC	ATAGCCGCTACCTACTCCT	157
Unigene49313	CCGTTTGCTTACCACCTAC	GCATCAACTCATTCATCTCC	284
Unigene17593	TCATGTCAGACTCCACCAAC	CTCAACCGAACATAATCAGC	292
Unigene1371	CCTCACCAACAGTTCAATCAC	TTGTGAACCTCATTGGGAAG	230
Unigene37946	ACGGTACGCACCATCATCC	CTCAATAGCAGCCGCCAAG	290
Unigene1734	CGACACGAGAATGAAGAAATG	AGAATAAGGCTAAGGCGGA	164
